# Supplementary material for: Single-Cell RNA Sequencing Analysis of Gene Regulatory Network Changes in the Development of Lung Adenocarcinoma
Source: MDPI journal article supplement (doi:10.3390/biom13040671), 2023-04-12
Supplement: s1 [file s1]

## Supplementary Table S1

Feature summary of the lung adenocarcinoma specimens and single-cell RNA sequencing data

| No | Patient id | Samples    | Tissue origins | Histology   | Smoking | Pathology | EGFR    | Stages |
|----|------------|------------|----------------|-------------|---------|-----------|---------|--------|
| 1  | P0001      | LUNG_N01   | nLung          | ADC         | Never   | MD        | WT      | IA     |
| 2  | P0006      | LUNG_N06   | nLung          | ADC         | Ex      | MD        | na      | IA     |
| 3  | P0008      | LUNG_N08   | nLung          | ADC         | Never   | MD        | L858R   | IB     |
| 4  | P0009      | LUNG_N09   | nLung          | ADC         | Ex      | PD        | WT      | IIA    |
| 5  | P0018      | LUNG_N18   | nLung          | ADC         | Ex      | MD        | del19   | IA     |
| 6  | P0019      | LUNG_N19   | nLung          | ADC         | Cur     | WD        | exon 20 | IA     |
| 7  | P0020      | LUNG_N20   | nLung          | ADC         | Cur     | PD        | WT      | IA     |
| 8  | P0028      | LUNG_N28   | nLung          | ADC(Double) | Cur     | na        | WT      | IIIA   |
| 9  | P0030      | LUNG_N30   | nLung          | ADC         | Never   | na        | del19   | IA     |
| 10 | P0031      | LUNG_N31   | nLung          | ADC         | Ex      | na        | WT      | IIIA   |
| 11 | P0034      | LUNG_N34   | nLung          | ADC         | Never   | MD        | WT      | IA3    |
| 12 | P0006      | LUNG_T06   | tLung          | ADC         | Ex      | MD        | na      | IA     |
| 13 | P0008      | LUNG_T08   | tLung          | ADC         | Never   | MD        | L858R   | IB     |
| 14 | P0009      | LUNG_T09   | tLung          | ADC         | Ex      | PD        | WT      | IIA    |
| 15 | P0018      | LUNG_T18   | tLung          | ADC         | Ex      | MD        | del19   | IA     |
| 16 | P0019      | LUNG_T19   | tLung          | ADC         | Cur     | WD        | exon 20 | IA     |
| 17 | P0020      | LUNG_T20   | tLung          | ADC         | Cur     | PD        | WT      | IA     |
| 18 | P0025      | LUNG_T25   | tLung          | ADC(Double) | Ex      | na        | WT      | IA     |
| 19 | P0028      | LUNG_T28   | tLung          | ADC(Double) | Cur     | na        | WT      | IIIA   |
| 20 | P0030      | LUNG_T30   | tLung          | ADC         | Never   | na        | del19   | IA     |
| 21 | P0031      | LUNG_T31   | tLung          | ADC         | Ex      | na        | WT      | IIIA   |
| 22 | P0034      | LUNG_T34   | tLung          | ADC         | Never   | MD        | WT      | IA3    |
| 23 | P1006      | EBUS_06    | tL/B           | ADC         | Cur     | PD        | WT      | IV     |
| 24 | P1028      | EBUS_28    | tL/B           | ADC         | Ex      | na        | WT      | IV     |
| 25 | P1049      | EBUS_49    | tL/B           | ADC         | Cur     | PD        | WT      | IV     |
| 26 | P1058      | BRONCHO_58 | tL/B           | ADC         | Never   | PD        | na      | IV     |

nLung, normal lung; tLung, early stage tumor lung; tL/B, advanced stage tumor lung; ADC, Adenocarcinoma; Cur, Current smoker; Ex, Ex-smoker; Never, Never smoker; PD, poorly differentiated; MD, moderately differentiated; WD, well differentiated;
