# Supplementary material for: Single-Cell RNA Sequencing Analysis of Gene Regulatory Network Changes in the Development of Lung Adenocarcinoma
Source: MDPI journal article supplement (doi:10.3390/biom13040671), 2023-04-12

Supplementary Figure S1

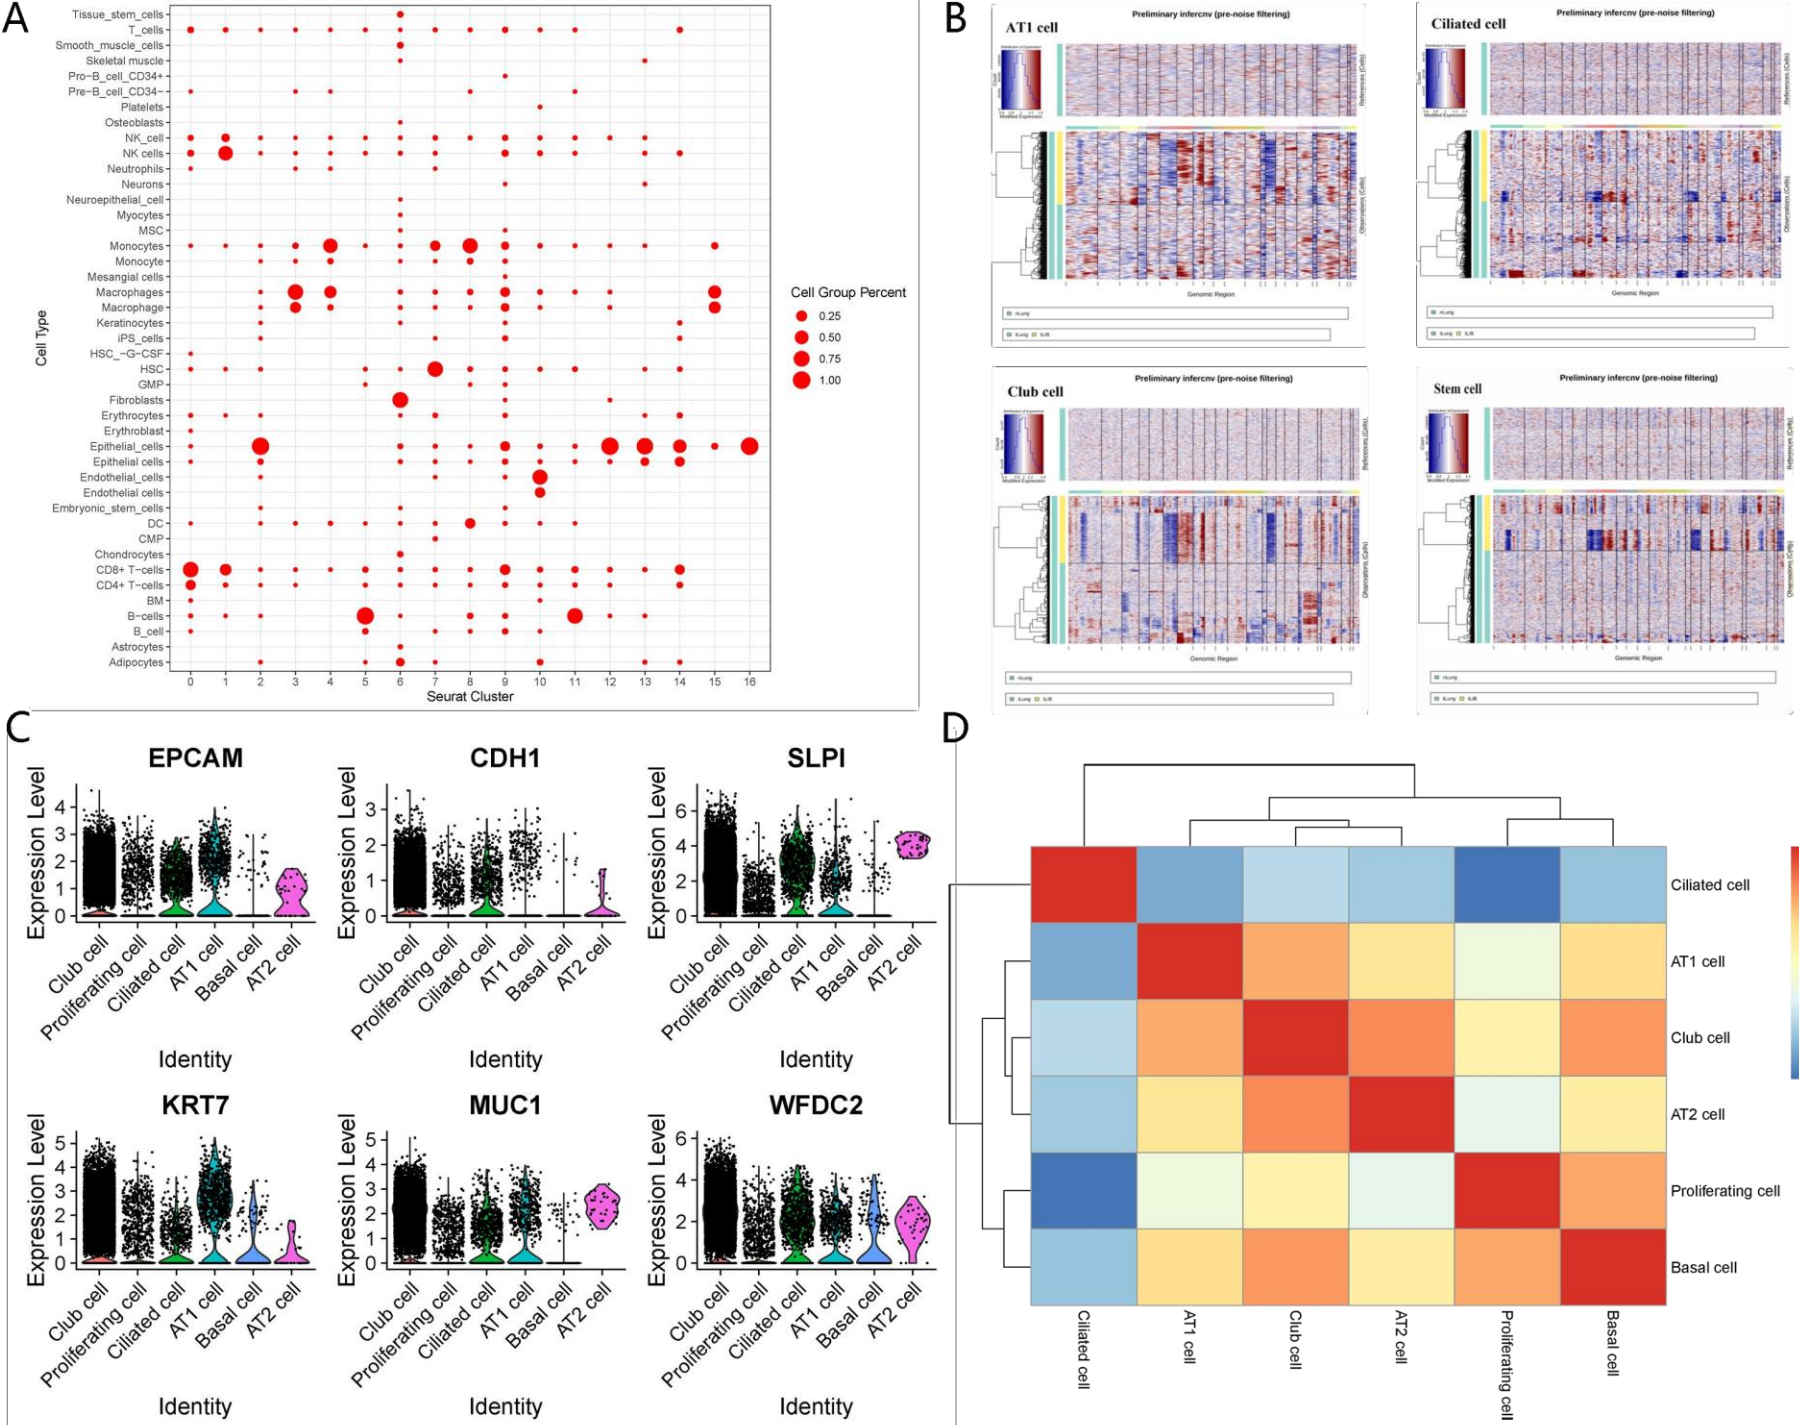

Supplementary Figure S2

A

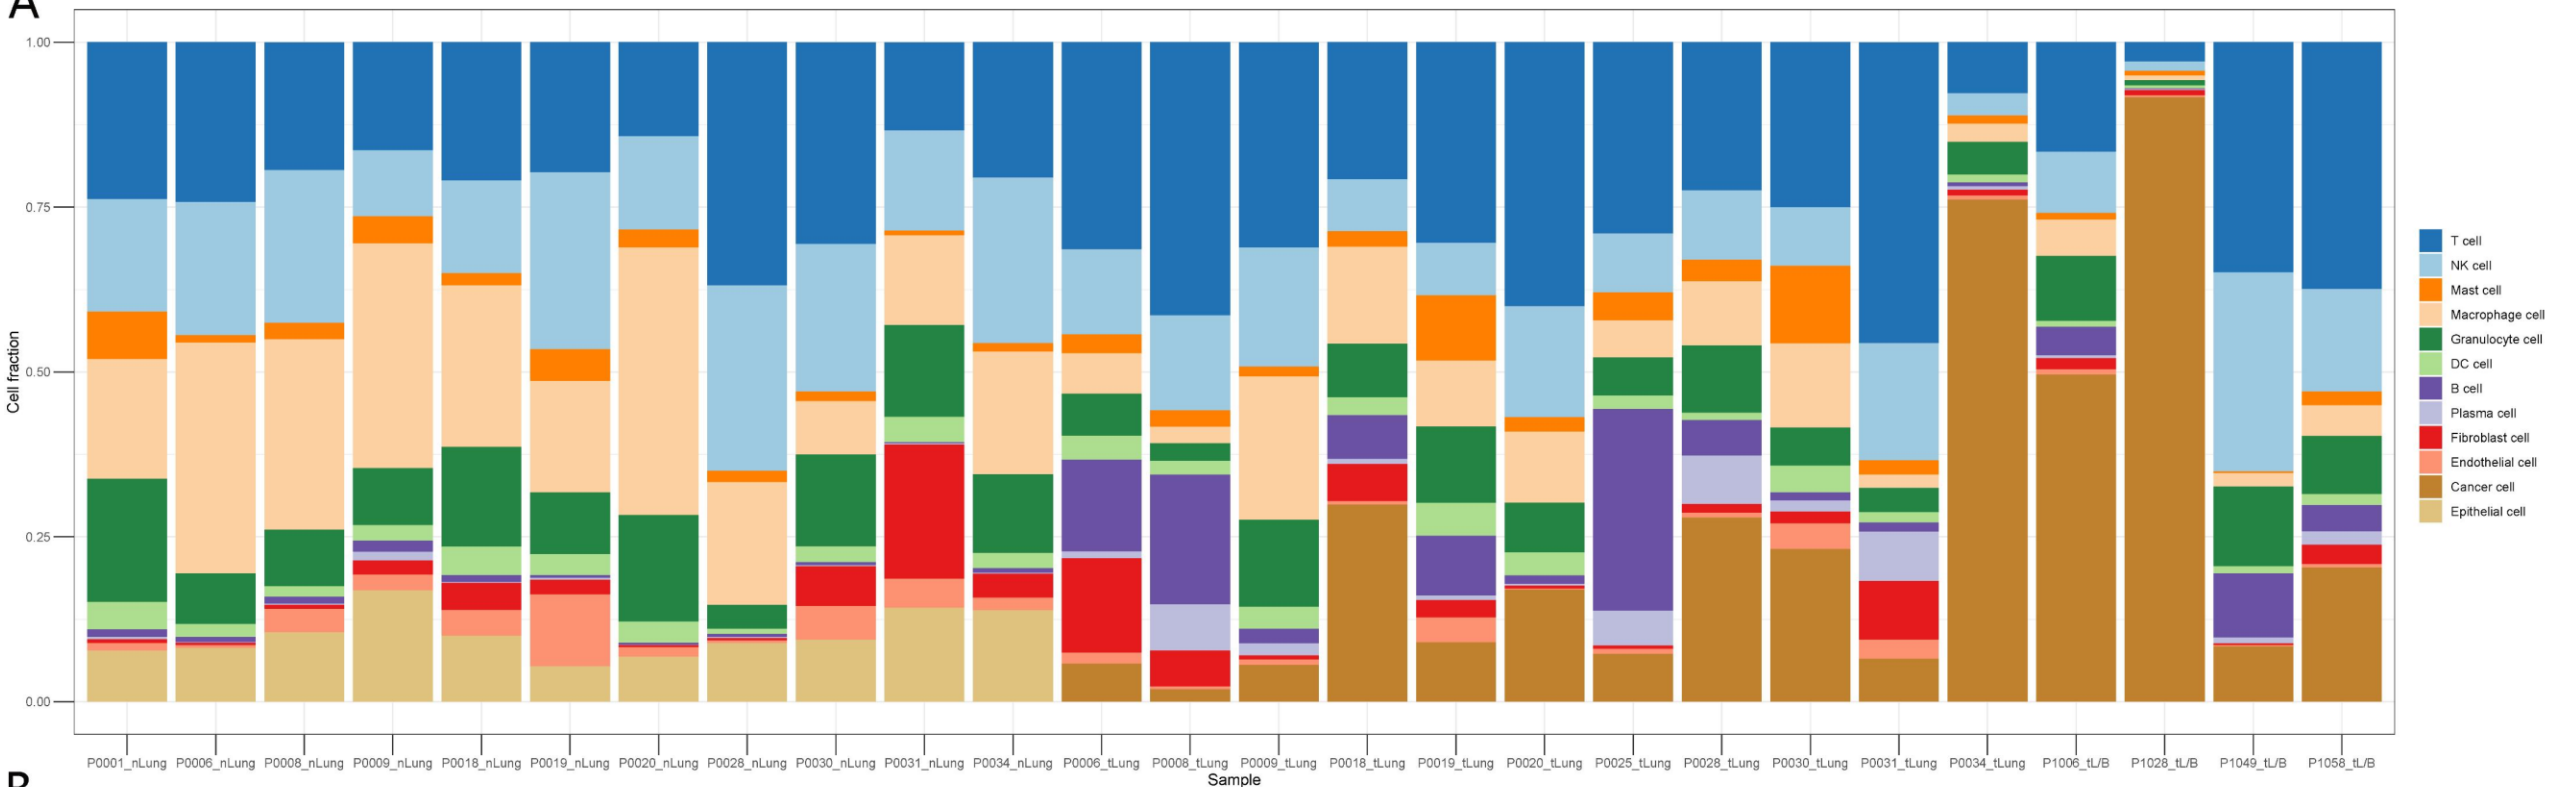

B

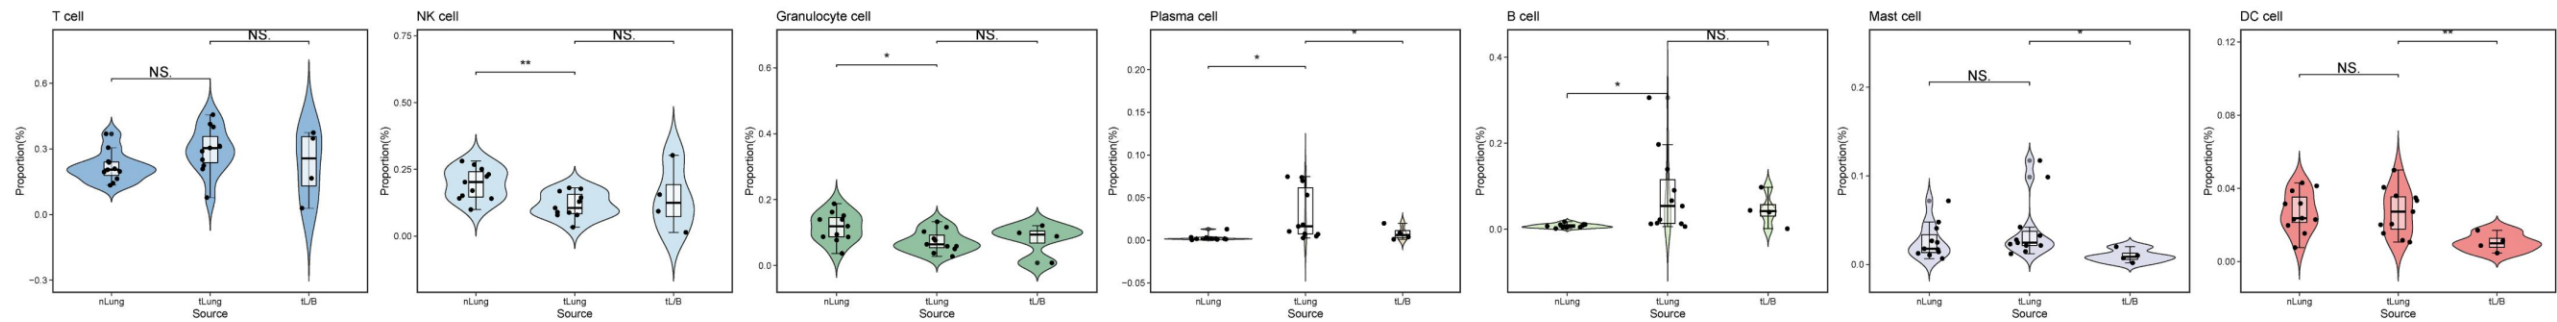

Supplementary Figure S3

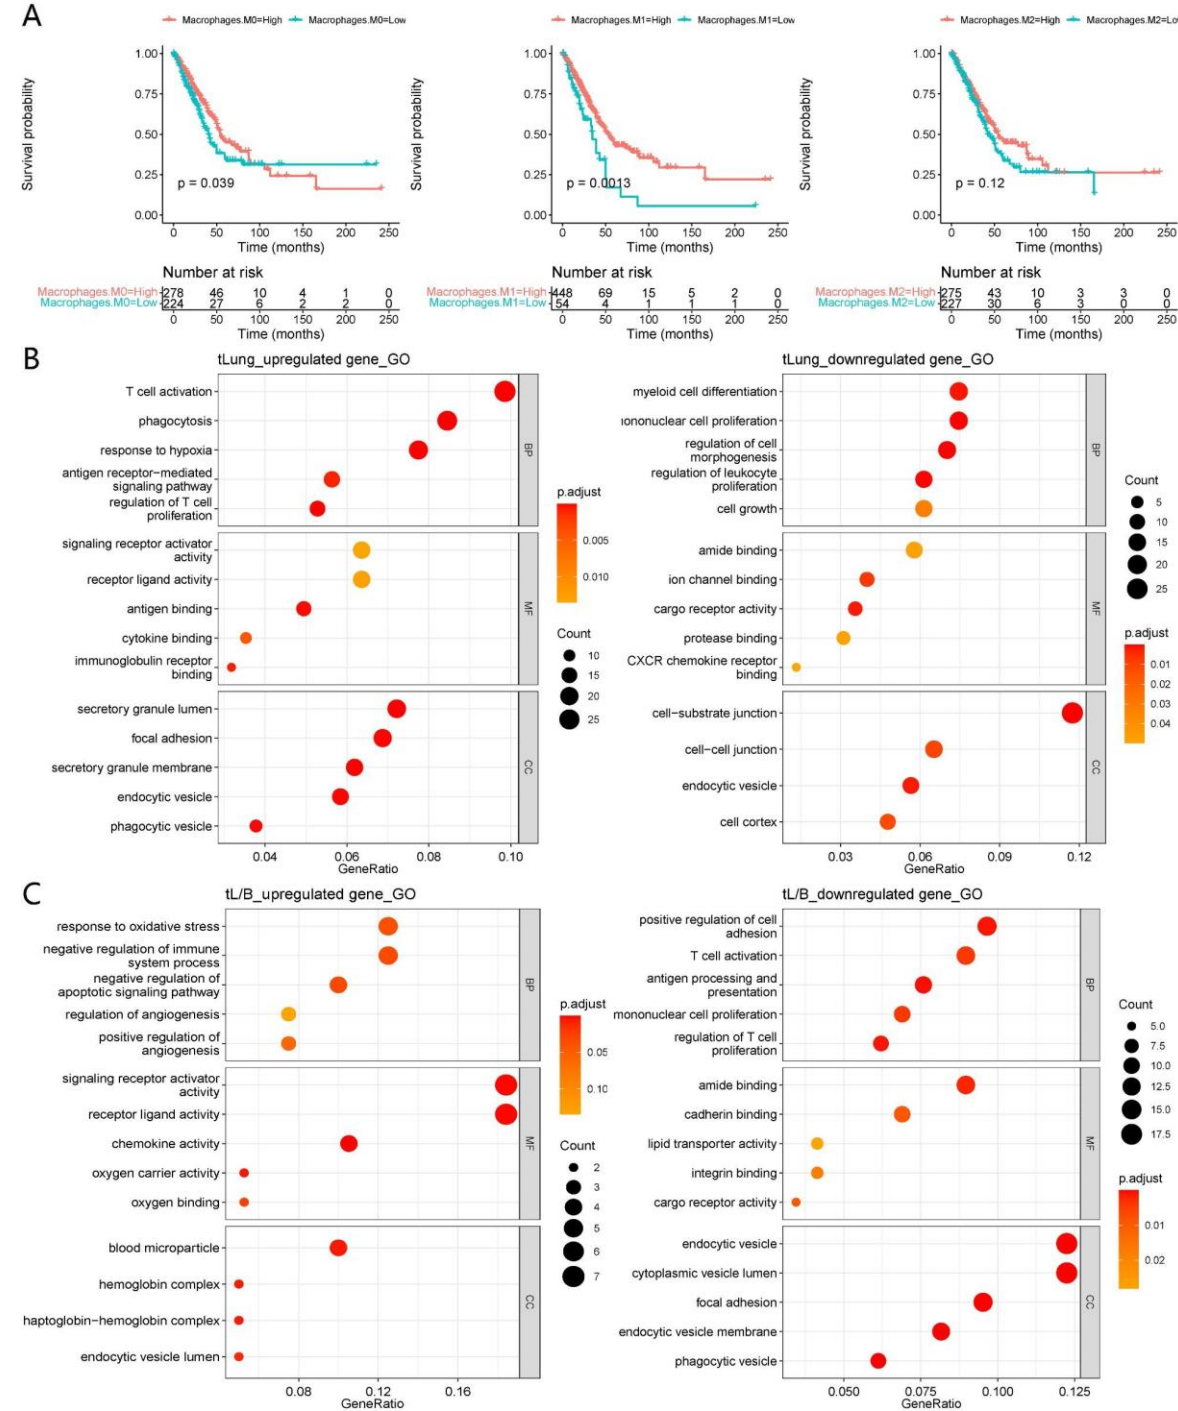

Supplementary Figure S4

**A** DEGs of nLung and tLung

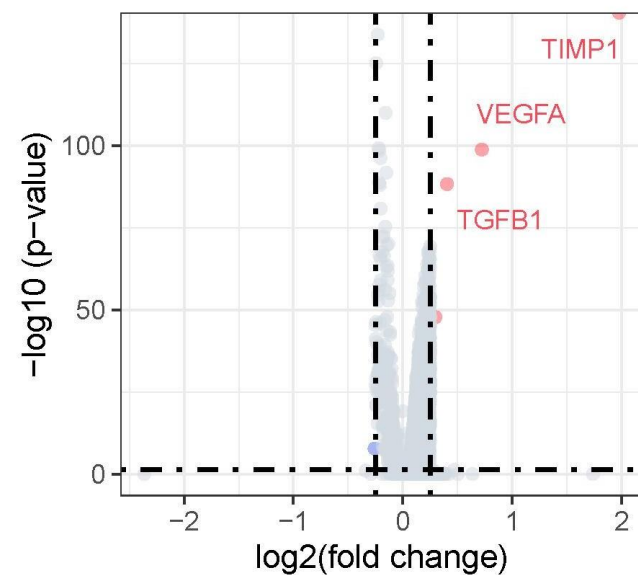

**B** DEGs of nLung and tLung

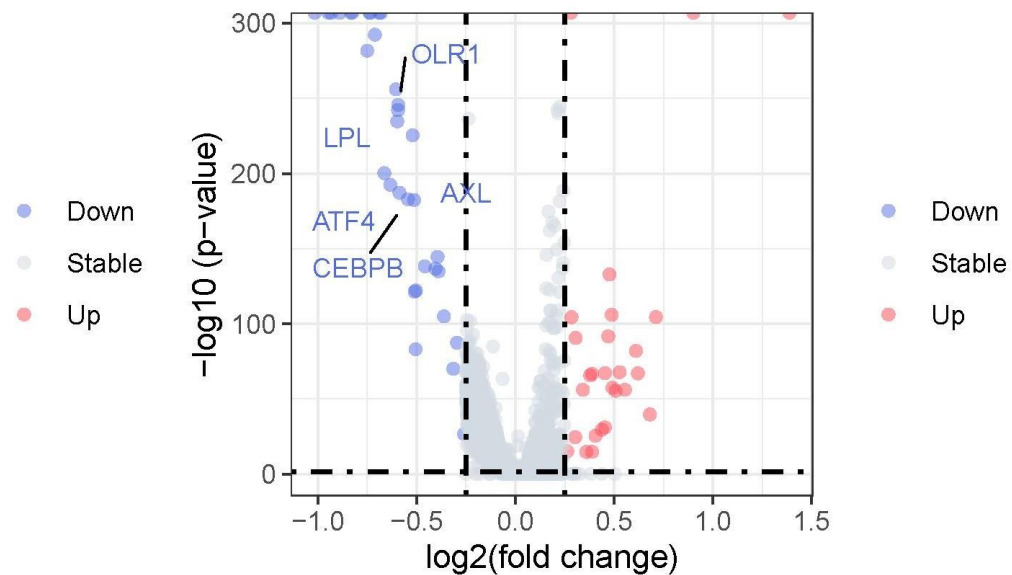

**C** DEGs of tLung and tL/B

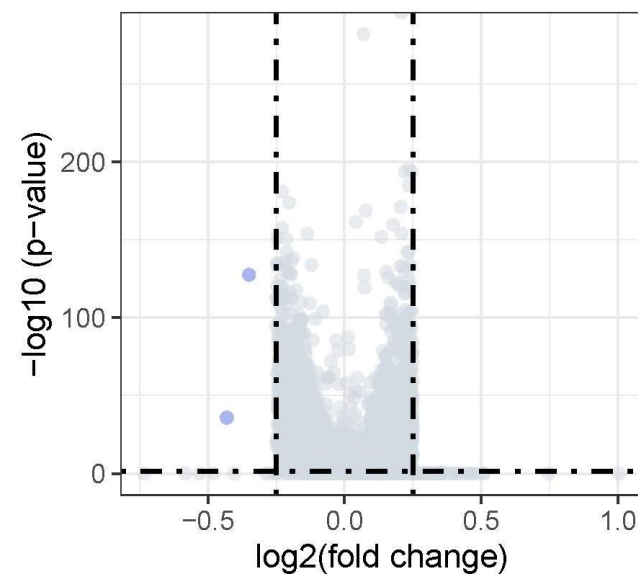

**D** DEGs of tLung and tL/B

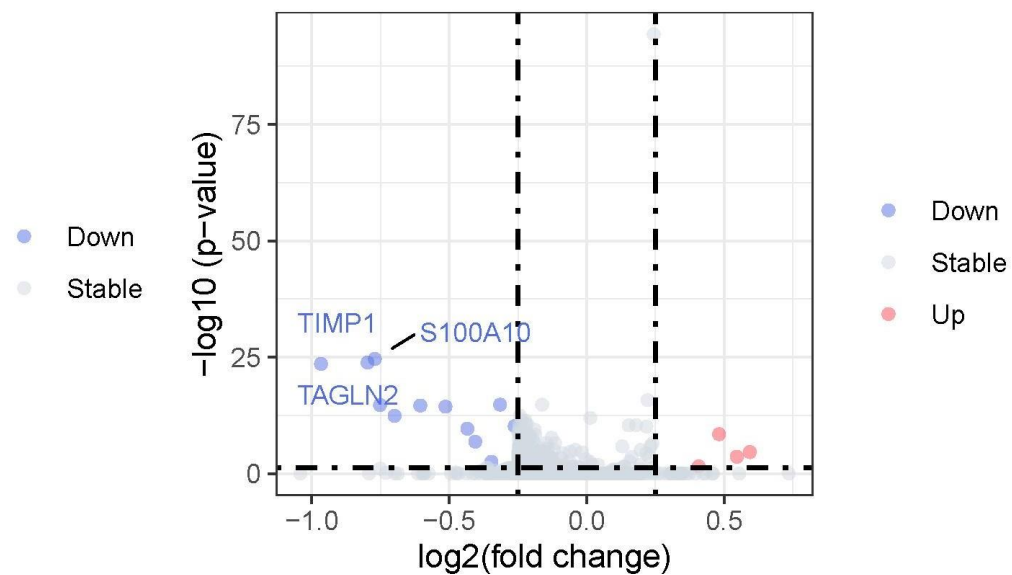



Supplementary Figure S5

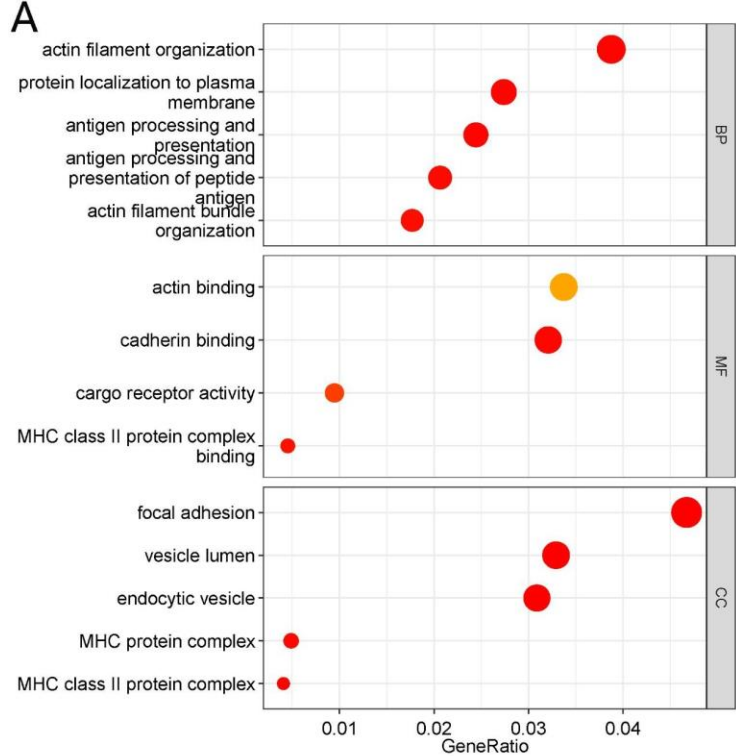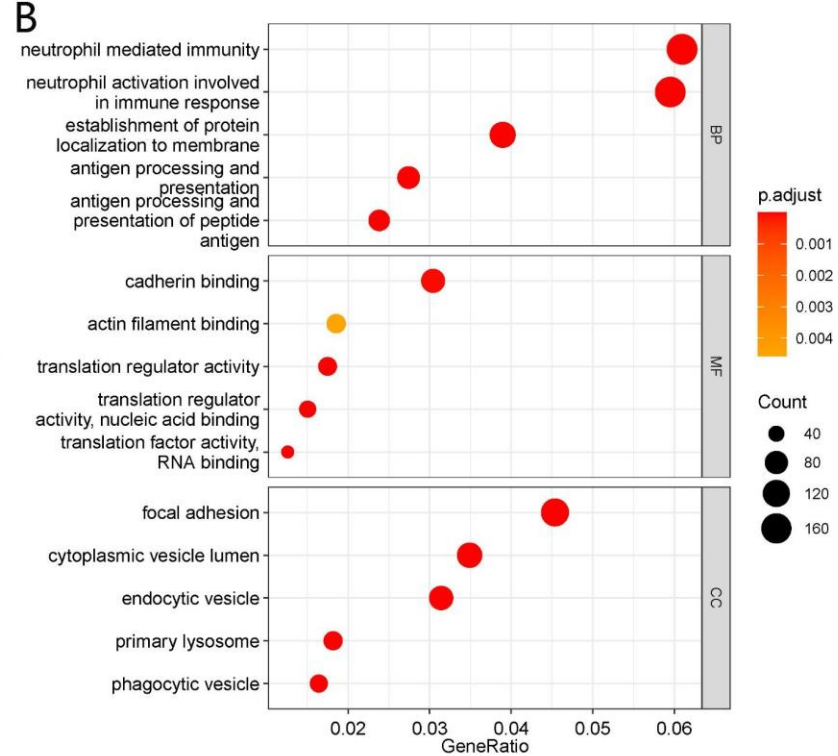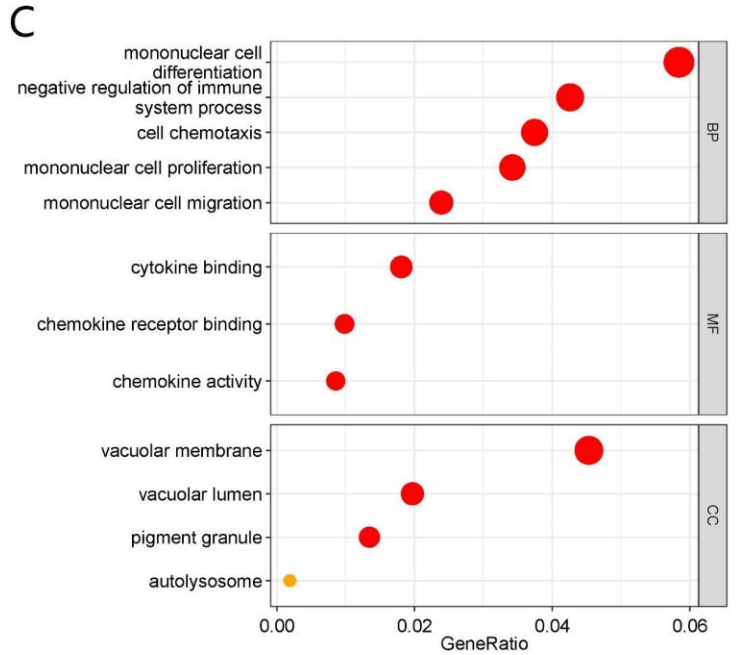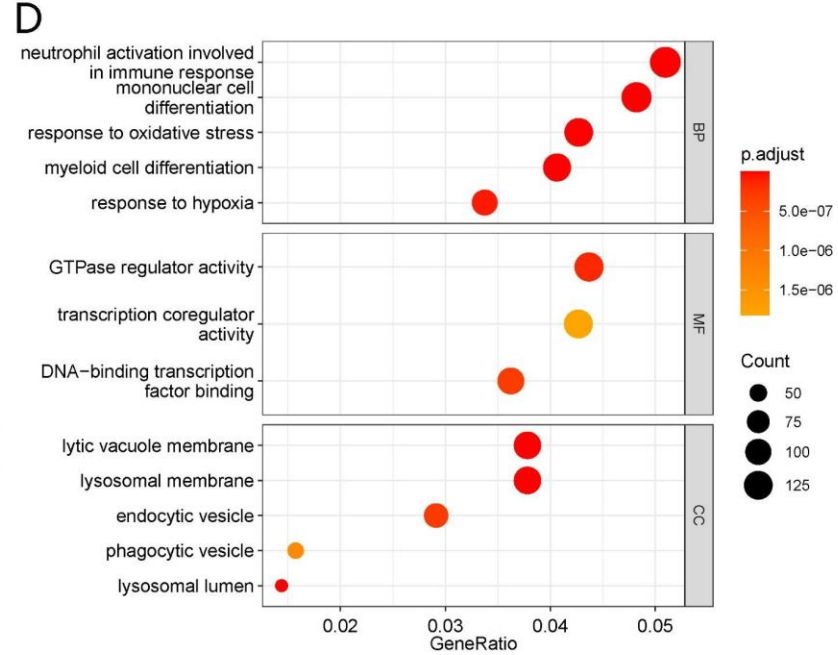

Supplementary Figure S6

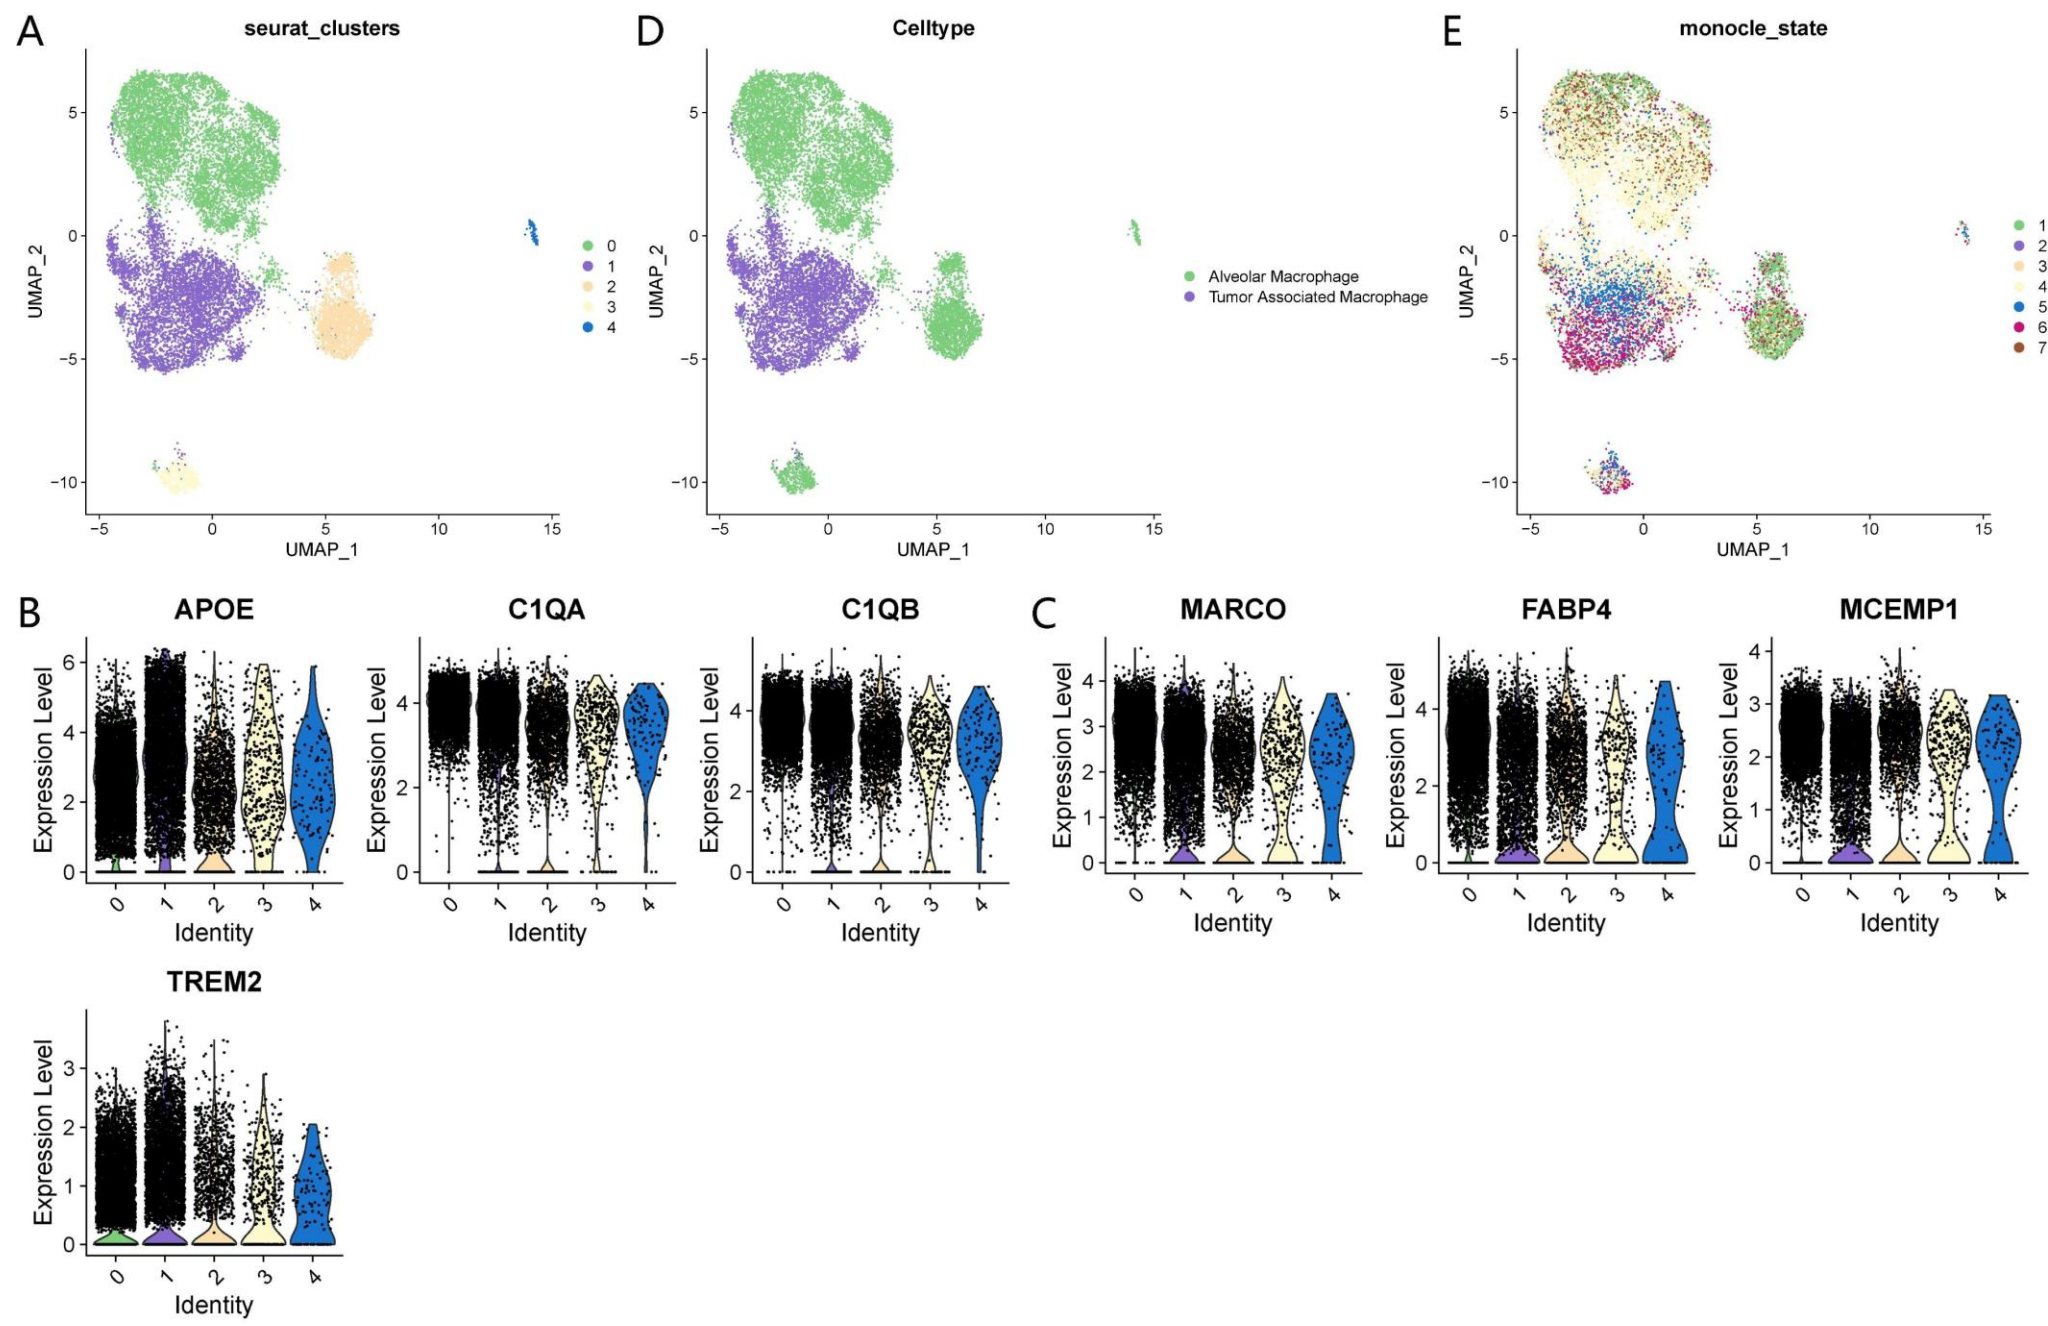

Supplementary Figure S7

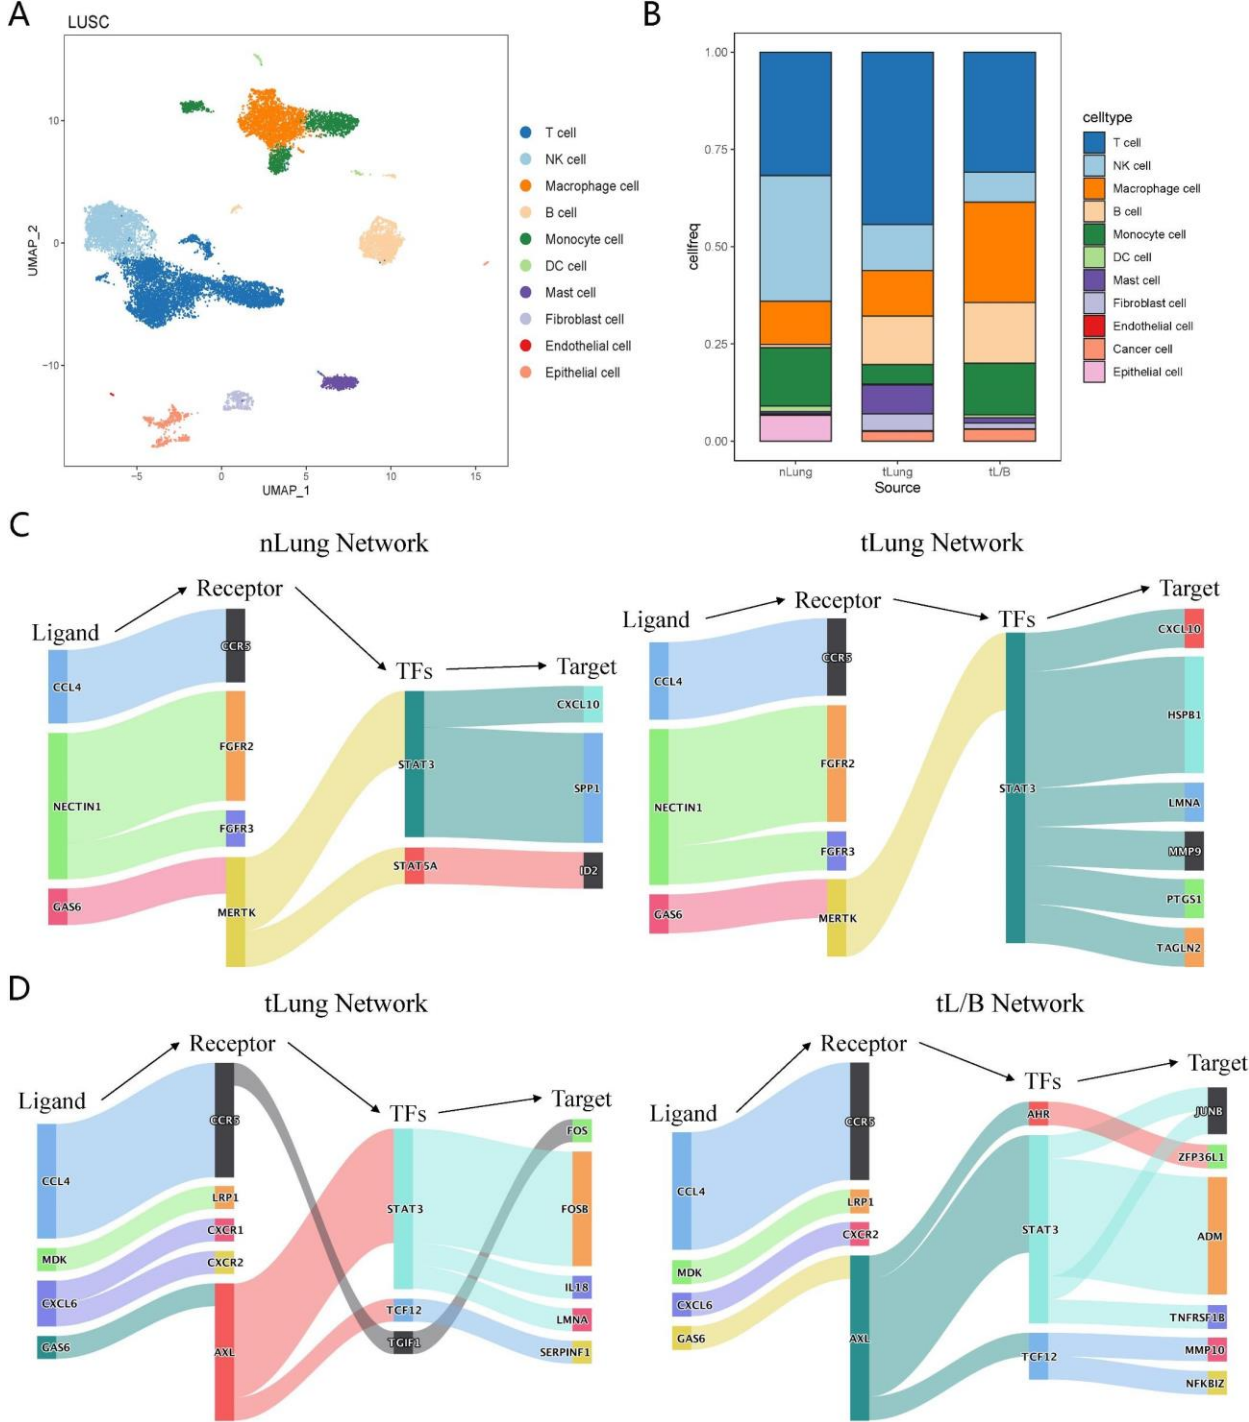

Supplement: s1 [file s1]
